# Supplementary material for: Synthesis and characterization of a new layered aluminophosphate templated with 1,3-diaminopropane: [H3N(CH2)3NH3]0.5[AlPO4(OH)(OH2)]·H2O †
Source: Royal Society of Chemistry journal article supplement (doi:10.1039/b002187n), 2000-01-01
Supplement: b002187n.doc [file b002187n.doc]

**Synthesis and Characterization of a New Layered Aluminophosphate templated with 1,3-diaminopropane: (H3N-(CH2)3-NH3)0.5[AlPO4(OH)(H2O)].H2O**

K. Maeda1┼, A. Tuel2* and Ch. Baerlocher1

***Supplementary material.***

Fractional coordinates and isotropic displacement parameters for APDAP150.

Atom x y z Uiso/Å2 pp

P1 0.3897(6) 0.0755(2) 0.0528(5) 0.0024(6)a

Al1 0.6324(10) 0.9920(2) 0.2462(5) 0.0024(6)a

O1 0.3271(12) 0.1429(2) 0.0705(8) 0.022(1)c 1.125d

O2 0.5588(11) 0.9384(3) 0.1022(6) 0.011(1)c

O3 0.5731(9) 0.0631(3) 0.1441(7) 0.011(1)c

O4 0.2225(9) 0.0339(3) 0.0985(8) 0.011(1)c

O5 0.3863(12) 0.9904(3) 0.3288(6) 0.022(1)c 1.125d

O6 0.1988(10) 0.9140(3) 0.1443(8) 0.033(2)c 1.25d

O7 0.6839(12) 0.6903(4) 0.1869(8) 0.08e 1.25d

N1 0.9258(13) 0.3593(4) 0.1340(10) 0.051(5) 1.286

C1 0.9508(17) 1/4 0.1122(19) 0.058(6)b

C2 0.8291(13) 0.3053(3) 0.0761(11) 0.058(6)b

H1 0.817(4) 0.3084(8) 0.9755(13) 0.06f

H2 0.701(2) 0.3007(7) 0.116(3) 0.06f

H3 0.069(3) 1/4 0.058(4) 0.06f

H4 0.982(5) 1/4 0.211(2) 0.06f

a,b Parameters with the same superscript were constrained to be equal

c The Uisos of OH (or O-) and OH2 environments were constrained to two and three times of U of the other framework oxygen atoms, respectively.

d The population parameters (pp) of oxygen atoms were increased to 1.125 and 1.25 to simulate OH(O-) and OH2 environments, respectively.

e The Uiso of oxygen atom of the non-framework water was held fixed at 0.08.

f Uiso for hydrogen atoms were held fixed at 0.06.
